# Supplementary material
Source: PubMed Central journal article supplement (PMC3963409)
Supplement: NIHMS530878-supplement-01.pdf [file NIHMS530878-supplement-01.pdf]

## Supplement Table: Overview of studies included in this review

| Author                               | Country         | Total Sample Size              | Sample Population                                                                                                                                                       | Covariates                                                                                      |
|--------------------------------------|-----------------|--------------------------------|-------------------------------------------------------------------------------------------------------------------------------------------------------------------------|-------------------------------------------------------------------------------------------------|
| Chen <i>et al</i> (2013)             | China           | 53 (cohort A)<br>50 (cohort B) | Adults from suburbs of Nanjing, China                                                                                                                                   | Socio-demographics                                                                              |
| D'Anna-Hernandez <i>et al</i> (2011) | United States   | 21                             | Non-smoking pregnant women (ages 18-45 years) who are at <17 weeks gestational age and experiencing non-complicated pregnancies                                         | Trimester of pregnancy                                                                          |
| Dettenborn <i>et al</i> (2010)       | Germany         | 59                             | Employed and unemployed adults                                                                                                                                          | Unemployment; hair-related characteristics                                                      |
| Dettenborn <i>et al</i> (2012)       | Germany         | 87                             | Depressed patients, healthy controls                                                                                                                                    | Depression                                                                                      |
| Dettenborn <i>et al</i> (2012)       | Germany         | 360                            | Healthy individuals (1-91 years old)                                                                                                                                    | Hair-related characteristics; socio-demographics and lifestyle factors                          |
| Dowlati <i>et al</i> (2010)          | Canada          | 121                            | Depressed and non-depressed patients attending a cardiac rehabilitation center                                                                                          | Depression; hair-related characteristics                                                        |
| Gerber <i>et al</i> (2013)           | Switzerland     | 42                             | University students                                                                                                                                                     | Socio-demographics; psychiatric symptoms; physical activity and other lifestyle factors         |
| Gow <i>et al</i> (2010)              | Canada; USA     | 187                            | Adults with adrenal insufficiency, house hold controls (all within the age range of 18-70 years old)                                                                    | Adrenal insufficiency; sex; hydrocortisone; drugs for osteopenia/osteoporosis                   |
| Grassi-Oliveira <i>et al</i> (2012)  | Brazil          | 23                             | Treatment seeking crack cocaine-dependent women                                                                                                                         | Negative life events; early life stress                                                         |
| Groeneveld <i>et al</i> (2013)       | The Netherlands | 42                             | Children entering school                                                                                                                                                | School entry; hair-related characteristics; socio-demographics; fearfulness; medication intake  |
| Hinkelmann <i>et al</i> (2013)       | Germany         | 84                             | Major depressive disorder patients, controls                                                                                                                            | Major depression; childhood maltreatment;                                                       |
| Karlén <i>et al</i> (2011)           | Sweden          | 99                             | Students                                                                                                                                                                | Socio-demographics; serious life events                                                         |
| Kirschbaum <i>et al</i> (2009)       | Germany         | 142                            | Mothers with newborns 2-4 days of age, mothers of toddlers 3 to 9 months, non-pregnant nulliparous women                                                                | Pregnancy; post-partum; being the mother of a toddler; age; frequency of hair washing           |
| Krumbholz <i>et al</i> (2013)        | Germany         | 1                              | Hair samples were collected over a pregnancy cycle                                                                                                                      | Pregnancy; hair segment                                                                         |
| Li <i>et al</i> (2012)               | China           | 58                             | Healthy male adolescents (mean±SD age: 16.2±1.2years), healthy males (mean±SD age: 27.3±2.5 years)                                                                      | Ultraviolet exposure; hot water immersion; shampoo immersion; location of hair on the head      |
| Luo <i>et al</i> (2012)              | China           | 84                             | Women with PTSD who experienced the earthquake , women without PTSD who did not experience earthquake, controls (from an area not significantly affected by earthquake) | Post-traumatic stress disorder                                                                  |
| Manenschiijn <i>et al</i> (2011)     | Netherlands     | 295                            | Bipolar disorder patients, healthy controls                                                                                                                             | Bipolar disorder; adiposity; sex                                                                |
| Manenschiijn <i>et al</i> (2011)     | Netherlands     | 122                            | Workers who worked in a fast-forward rotating shift, workers who only worked during the day                                                                             | Shiftwork; adiposity                                                                            |
| Manenschiijn <i>et al</i> (2011)     | Netherlands     | 205                            | Healthy adults, hypercortisolemic, and a hypocortisolemic                                                                                                               | Cushing's syndrome; adiposity; socio-demographics; hair-related characteristics; blood pressure |
| Manenschiijn <i>et al</i> (2012)     | Netherlands     | 116                            | Patients with Cushing's syndrome, patients with cyclic Cushing's syndrome, non-obese healthy controls                                                                   | Cushing's syndrome; socio-demographics                                                          |
| Manenschiijn <i>et al</i> (2013)     | The Netherlands | 283                            | Elderly adults                                                                                                                                                          | Cardiovascular disease; socio-demographics; adiposity; lifestyle factors                        |
| O'Brien <i>et al</i> (2012)          | United States   | 135                            | Adults                                                                                                                                                                  | Socio-demographics; subjective stress; adiposity; blood pressure                                |
| Pereg <i>et al</i> (2011)            | Israel          | 112                            | Acute myocardial infarction patients, hospitalized controls                                                                                                             | Acute myocardial infarction                                                                     |

|                                    |         |                               |                                                                                                                |                                                                                                                             |
|------------------------------------|---------|-------------------------------|----------------------------------------------------------------------------------------------------------------|-----------------------------------------------------------------------------------------------------------------------------|
| <b>Raul <i>et al</i> (2004)</b>    | France  | 44                            | Healthy individuals                                                                                            | Hair-related characteristics; socio-demographics                                                                            |
| <b>Saleem <i>et al</i> (2013)</b>  | Canada  | 56                            | Cardiac rehabilitation patients                                                                                | One year verbal memory; socio-demographic factors; psychiatric symptoms; adiposity; medication intake                       |
| <b>Sauvé <i>et al</i> (2007)</b>   | Canada  | 39                            | Healthy individuals                                                                                            | Hair-related characteristics; sex                                                                                           |
| <b>Skoluda <i>et al</i> (2012)</b> | Germany | 395                           | Amateur endurance athletes, controls                                                                           | Endurance sports; cigarette smoking; gender                                                                                 |
| <b>Stalder <i>et al</i> (2010)</b> | Germany | 76                            | Alcoholics in acute withdrawal, abstinent alcoholics, gender-and-age matched controls                          | Alcoholism                                                                                                                  |
| <b>Stalder <i>et al</i> (2012)</b> | Germany | 155 (study 1)<br>58 (study 2) | Healthy individuals                                                                                            | Stress related measures; adiposity; hair-related characteristics; socio-demographics; lifestyle factors                     |
| <b>Stalder <i>et al</i> (2012)</b> | Germany | 45 (study 1)<br>68 (study 2)  | Healthy individuals                                                                                            | Intra-individual stability of hair cortisol concentrations                                                                  |
| <b>Stalder <i>et al</i> (2013)</b> | Germany | 1258                          | Employees of an aerospace company                                                                              | Metabolic syndrome (MetS); cardio-metabolic parameters; hair-related characteristics; socio-demographics; lifestyle factors |
| <b>Stuedte <i>et al</i> (2011)</b> | Germany | 30                            | Generalized anxiety disorder patients and gender-and-age matched controls                                      | Generalized anxiety disorder                                                                                                |
| <b>Stuedte <i>et al</i> (2011)</b> | Uganda  | 27                            | Post-Traumatic Stress Disorder (PTSD) patients, traumatized controls without PTSD                              | Post-traumatic stress disorder; gender                                                                                      |
| <b>Stuedte <i>et al</i> (2013)</b> | Germany | 78                            | PTSD patients, traumatized controls, non-traumatized controls                                                  | PTSD; trauma; lifestyle factors                                                                                             |
| <b>Thomson <i>et al</i> (2010)</b> | Canada  | 38                            | Cushing's syndrome patients, healthy controls                                                                  | Cushing's syndrome                                                                                                          |
| <b>Vaghri <i>et al</i> (2012)</b>  | Canada  | 333                           | Healthy preschoolers                                                                                           | Parental Income; maternal and paternal education; age; gender                                                               |
| <b>Van Uum <i>et al</i> (2008)</b> | Canada  | 54                            | Chronic pain patients, non-obese controls                                                                      | Chronic pain                                                                                                                |
| <b>Xie <i>et al</i> (2011)</b>     | China   | 40                            | Non-obese healthy male graduate students (22-30 years old), female participants                                | Hair segment                                                                                                                |
| <b>Yamada <i>et al</i> (2007)</b>  | Canada  | 60                            | Neonatal intensive care unit (NICU) infants >25 weeks gestational age, NICU term infants, healthy term infants | Stay in neonatal intensive care unit (NICU)                                                                                 |
